# Supplementary material
Source: Springer Nature journal article supplement (https://www.springermedizin.de/resource/supplementary/12881_2012_1175_MOESM5_ESM.pdf/9452056)
Supplement: MOESM5 [file 9452056]

(A)

| Diagnosis           | Adenoid Samples  |                            |                       |                                 |                                 | Tonsil Samples   |                            |                       |                                 |                                 |
|---------------------|------------------|----------------------------|-----------------------|---------------------------------|---------------------------------|------------------|----------------------------|-----------------------|---------------------------------|---------------------------------|
|                     | O<br>A<br>Z<br>1 | A<br>D<br>A<br>M<br>1<br>2 | D<br>O<br>C<br>K<br>1 | T<br>C<br>E<br>R<br>G<br>1<br>L | P<br>P<br>P<br>R<br>R<br>2<br>D | O<br>A<br>Z<br>1 | A<br>D<br>A<br>M<br>1<br>2 | D<br>O<br>C<br>K<br>1 | T<br>C<br>E<br>R<br>G<br>1<br>L | P<br>P<br>P<br>R<br>R<br>2<br>D |
| rAOM 1              |                  |                            |                       |                                 |                                 |                  |                            |                       |                                 |                                 |
| rAOM 2              |                  |                            |                       |                                 |                                 |                  |                            |                       |                                 |                                 |
| rAOM 3              |                  |                            |                       |                                 |                                 |                  |                            |                       |                                 |                                 |
| rAOM 4              |                  |                            |                       |                                 |                                 |                  |                            |                       |                                 |                                 |
| OSD 1               |                  |                            |                       |                                 |                                 |                  |                            |                       |                                 |                                 |
| OSD 2               |                  |                            |                       |                                 |                                 |                  |                            |                       |                                 |                                 |
| OSD 4               |                  |                            |                       |                                 |                                 |                  |                            |                       |                                 |                                 |
| OSD 5               |                  |                            |                       |                                 |                                 |                  |                            |                       |                                 |                                 |
| OSD 6               |                  |                            |                       |                                 |                                 |                  |                            |                       |                                 |                                 |
| OSD, RAT, OME, rAOM |                  |                            |                       |                                 |                                 |                  |                            |                       |                                 |                                 |
| OME, OSD            |                  |                            |                       |                                 |                                 |                  |                            |                       |                                 |                                 |
| RAT, OME            |                  |                            |                       |                                 |                                 |                  |                            |                       |                                 |                                 |

Where rAOM = recurrent acute otitis media, OSD = obstructive sleep disorder,  
RAT = recurrent acute tonsillitis, OME = otitis media with effusion.

(B)

|            |      | O<br>A<br>Z<br>1 | A<br>D<br>A<br>M<br>1<br>2 | D<br>O<br>C<br>K<br>1 | T<br>C<br>E<br>R<br>G<br>1<br>L | P<br>P<br>P<br>R<br>R<br>2<br>D |
|------------|------|------------------|----------------------------|-----------------------|---------------------------------|---------------------------------|
| Epithelial | A549 |                  |                            |                       |                                 |                                 |
|            | D562 |                  |                            |                       |                                 |                                 |
| Macrophage | U937 |                  |                            |                       |                                 |                                 |
|            | THP1 |                  |                            |                       |                                 |                                 |
|            | MM6  |                  |                            |                       |                                 |                                 |
